# Supplementary material
Source: PubMed Central journal article supplement (PMC129704)

**Table 2. List of proteins with Helix-hairpin-helix motif(s) located either at the N- or C termini of a protein**

---

Proteins are represented using the Simple Modular Architecture Research Tool SMART (<http://smart.embl-heidelberg.de>)

---

**Protein Q93H64**

**Description PUTATIVE BIFUNCTIONAL PROTEIN.**

**Species Streptomyces avermitilis**

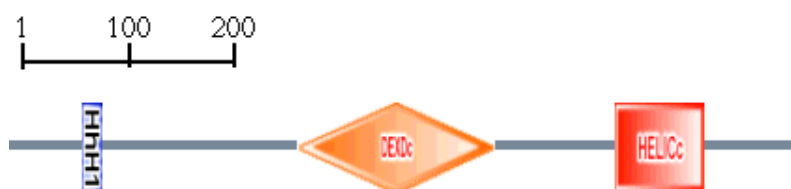

**Protein Q9CEH6**

**Description HYPOTHETICAL PROTEIN YTDC.**

**Species Lactococcus lactis**

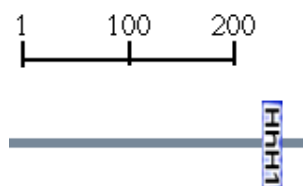

**Protein O00847**

**Description RAD51 HOMOLOGUE.**

**Species Trypanosoma brucei**

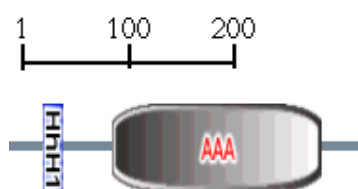

**Protein Q8Y7P2**

**Description HYPOTHETICAL PROTEIN LMO1231.**

**Species Listeria monocytogenes**

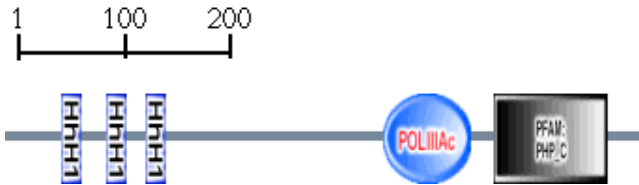

**Protein RL32\_HALN1**

**Description 50S ribosomal protein L32E.**

**Species Halobacterium**

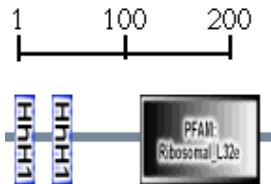

**Protein Q99YR8**

**Description HYPOTHETICAL PROTEIN SPY1571.**

**Species Streptococcus pyogenes**

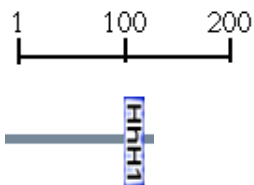

**Protein Q55769**

**Description COME ORF1.**

**Species Synechocystis**

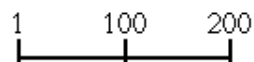

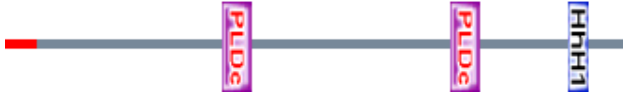

**Protein** YACK\_BACSU  
**Description** Hypothetical protein yacK.  
**Species** Bacillus subtilis

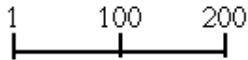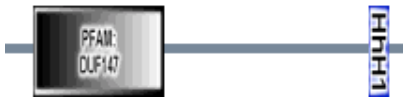

**Protein** Q91VP3  
**Description** SIMILAR TO EXCISION REPAIR 1.  
**Species** Mus musculus

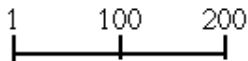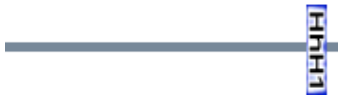

**Protein** P91153  
**Description** CODED FOR BY C. ELEGANS CDNA CEESQ34R.  
**Species** Caenorhabditis elegans

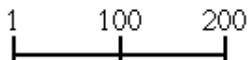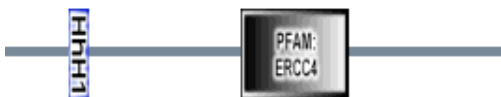

**Protein** P77987  
**Description** DNA POLYMERASE FAMILY X (EC 2.7.7.7)  
 (DNA-DIRECTED DNA POLYMERASE)(DNA

**Description** NUCLEOTIDYLTRANSFERASE (DNA-DIRECTED).

**Species** *Thermus aquaticus*

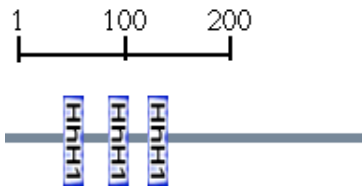

**Protein** Q9KGG0

**Description** BH0105 PROTEIN.

**Species** *Bacillus halodurans*

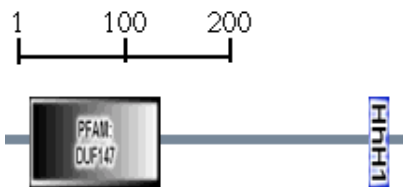

**Protein** AAM31590

**Description** DNA POLYMERASE BETA (EC 2.7.7.7).

**Species** *Methanosarcina mazei goe1*

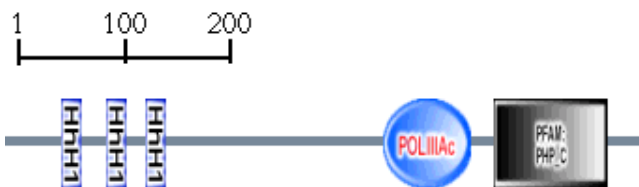

**Protein** Q9APN0

**Description** NUSA PROTEIN (FRAGMENT).

**Species** *Myxococcus xanthus*

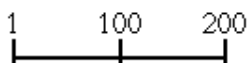

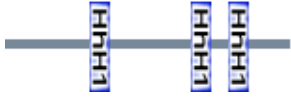

**Protein Q8XHQ0**

**Description** HYPOTHETICAL PROTEIN CPE2432.

**Species** Clostridium perfringens

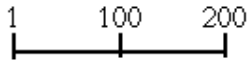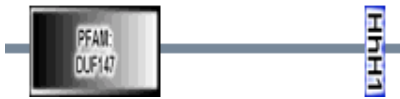

**Protein Q9C0F7**

**Description** KIAA1706 PROTEIN (FRAGMENT).

**Species** Homo sapiens

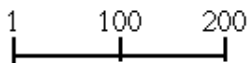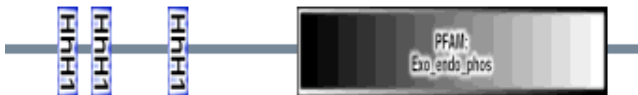

**Protein Q8XGV0**

**Description** PUTATIVE DNA UPTAKE PROTEIN AND RELATED DNA-BINDING PROTEINS (PUTATIVE EXPORTED PROTEIN).

**Species** Salmonella typhimurium

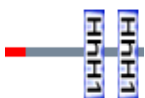

**Protein O26650**

**Description** DNA-DEPENDENT DNA POLYMERASE FAMILY X.

**Species** *Methanobacterium thermoautotrophicum*

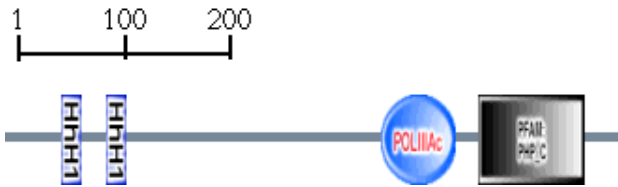

**Protein** AAM02649

**Description** TOPOISOMERASE V.

**Species** *Methanopyrus kandleri av19*

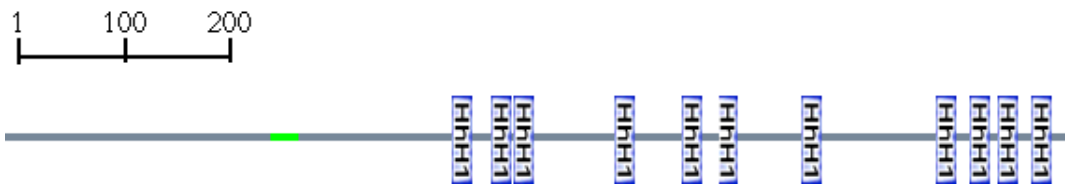

**Protein** Q9D7J3

**Description** 2310005P05RIK PROTEIN.

**Species** *Mus musculus*

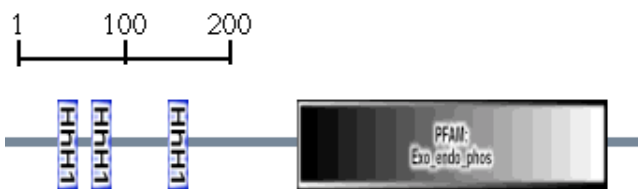

**Protein** AAM38234

**Description** ATP-DEPENDENT DNA HELICASE.

**Species** *Xanthomonas axonopodis*

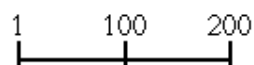

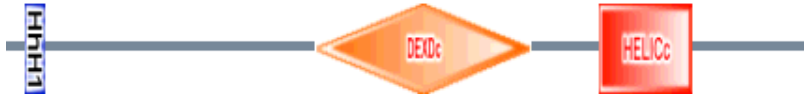

**Protein P94624**

**Description** CDU2, CDU1, TCDD, TCDB, TCDE, TCDA, TCDC, CDD1, CDD2, CDD3, AND CDD4GENES (CDD1 PROTEIN).

**Species** Clostridium difficile

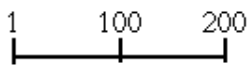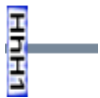

**Protein O74103**

**Description** 90AA LONG HYPOTHETICAL DNA EXCISION REPAIR PROTEIN.

**Species** Pyrococcus horikoshii

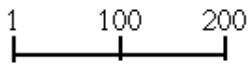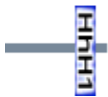

**Protein AAK99660**

**Description** COMPETENCE PROTEIN.

**Species** Streptococcus pneumoniae r6

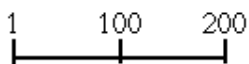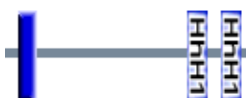

**Protein** AAM02248  
**Description** LHR-LIKE SUPERFAMILY II HELICASE.  
**Species** Methanopyrus kandleri av19

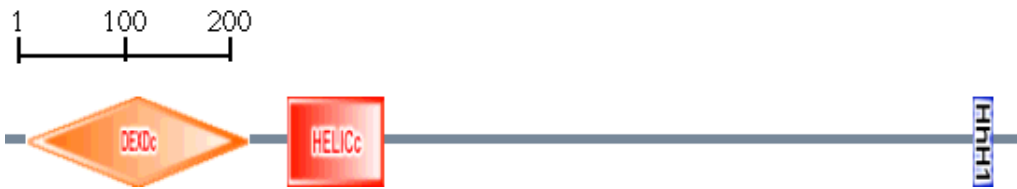

**Protein** AAH28155  
**Description** KINESIN-LIKE 4.  
**Species** Homo sapiens

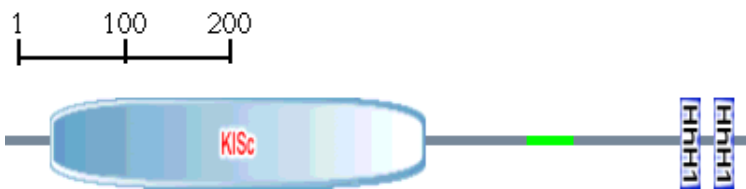

**Protein** P71728  
**Description** HYPOTHETICAL 30.5 KDA PROTEIN.  
**Species** Mycobacterium tuberculosis

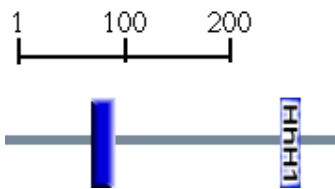

**Protein** AAM06574  
**Description** HELICASE.  
**Species** Methanosarcina acetivorans str

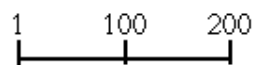



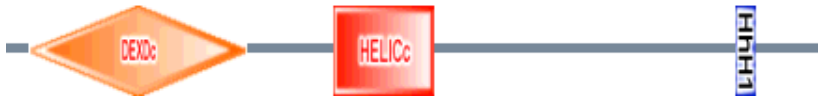

**Protein Q9YC15**

**Description HYPOTHETICAL 28.7 KDA PROTEIN APE1436.**

**Species Aeropyrum pernix**

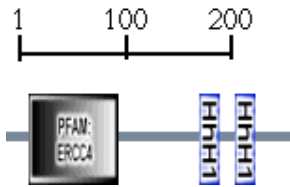

**Protein AAK99347**

**Description EXONUCLEASE ABC-SUBUNIT C.**

**Species Streptococcus pneumoniae r6**

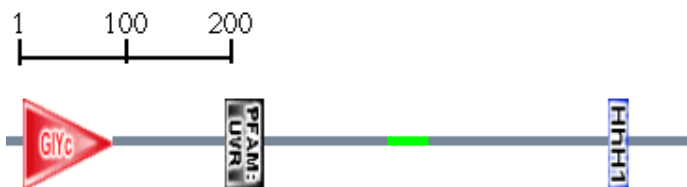

**Protein AAL93832**

**Description NAD-DEPENDENT DNA LIGASE (EC 6.5.1.2).**

**Species nucleatum**

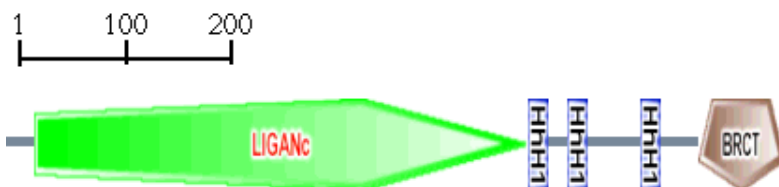

**Protein AAH08930**

**EXCISION REPAIR CROSS-COMPLEMENTING  
RODENT REPAIR**

**Description** DEFICIENCY, COMPLEMENTATION GROUP 1  
(INCLUDES OVERLAPPING ANTISENSE  
SEQUENCE).

**Species** Homo sapiens

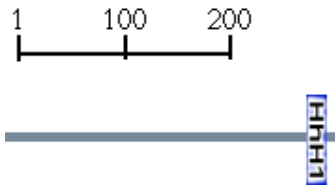

**Protein** EX9\_ECOLI

**Description** Exodeoxyribonuclease IX (EC 3.1.11.-) (Exonuclease IX) (Exo IX).

**Species** Escherichia coli

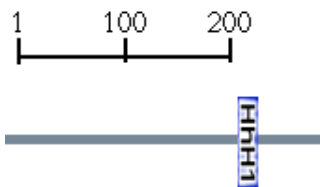

**Protein** AAL81517

**Description** HYPOTHETICAL 74.5 KDA PROTEIN.

**Species** Pyrococcus furiosus dsm 3638

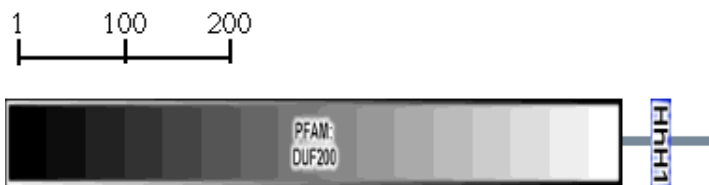

**Protein** Q8Y3B2

**Description** PROBABLE SMF PROTEIN.

**Species** Ralstonia solanacearum

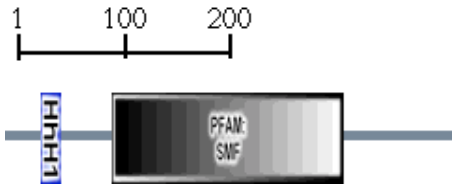

**Protein Q8XBD5**

**Description** EXCINUCLEASE ABC, SUBUNIT C, REPAIR OF UV DAMAGE TO DNA.

**Species** Escherichia coli o157:h7

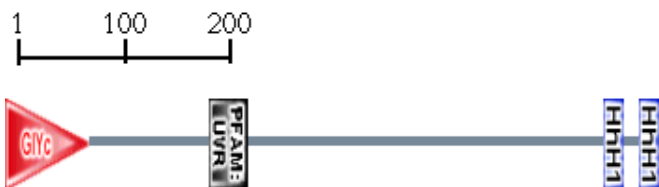

**Protein Q8XIJ9**

**Description** COME OPERON PROTEIN.

**Species** Clostridium perfringens

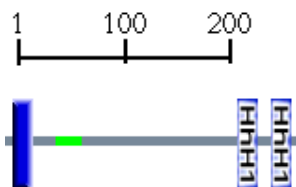

**Protein Q9PJA0**

**Description** PUTATIVE NON-SPECIFIC DNA BINDING PROTEIN.

**Species** Campylobacter jejuni

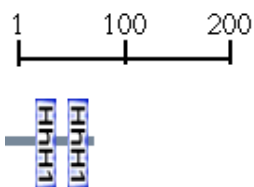

**Protein** Q9RA49  
**Description** DNA-3-METHYLADENINE GLYCOSIDASE  
(FRAGMENT).  
**Species** *Thermus aquaticus*

1 100 200

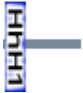

**Protein** AAM25145  
**Description** NUCLEASE SUBUNIT OF THE EXCINUCLEASE  
COMPLEX.  
**Species** *Thermoanaerobacter tengcongensis*

1 100 200

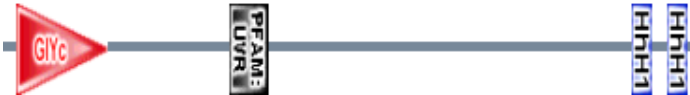

**Protein** BAB95406  
**Description** MW1541 PROTEIN.  
**Species** *Staphylococcus aureus*

1 100 200

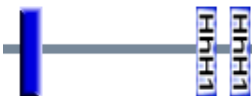

**Protein** AAM01328  
**Description** PREDICTED SUPERFAMILY II HELICASE.  
**Species** *Methanopyrus kandleri av19*

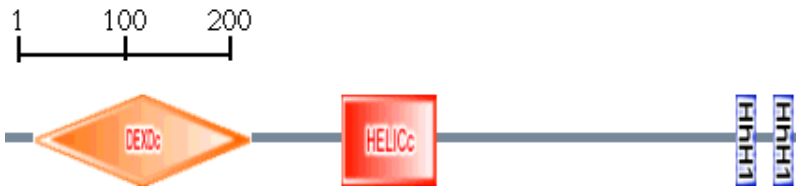

**Protein** AAM25645

**Description** DNA POLYMERASE IV (FAMILY X).

**Species** Thermoanaerobacter tengcongensis

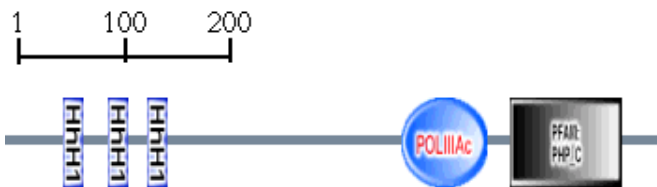

**Protein** AAL95150

**Description** HYPOTHETICAL CYTOSOLIC PROTEIN.

**Species** nucleatum

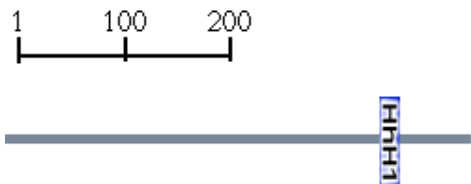

**Protein** Q8VQ77

**Description** LATE COMPETENCE PROTEIN COMEA.

**Species** Bacillus licheniformis

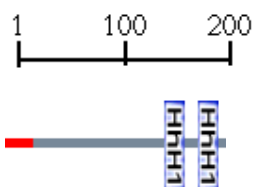

**Protein** HELS\_METJA

**Putative ski2-type helicase (EC 3.6.1.-) [Contains:**

**Description** Endonuclease PI-MjaHel (EC 3.1.-.-) (Mja Hel intein)  
(Mja Pep3 intein)].

**Species** Methanococcus jannaschii

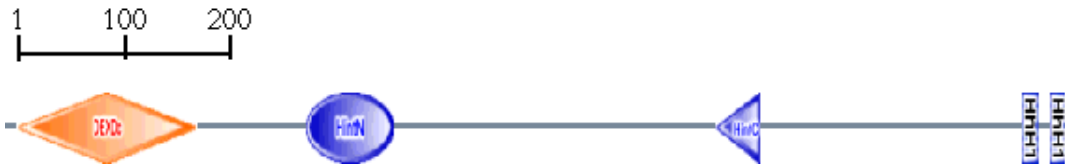

**Protein** Q92D76

**Description** LIN0944 PROTEIN.

**Species** Listeria innocua

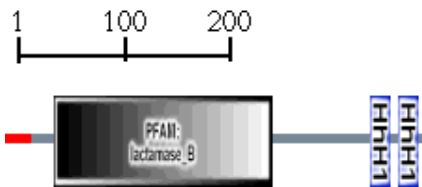

**Protein** AAL95286

**Description** EXCINUCLEASE ABC SUBUNIT C.

**Species** nucleatum

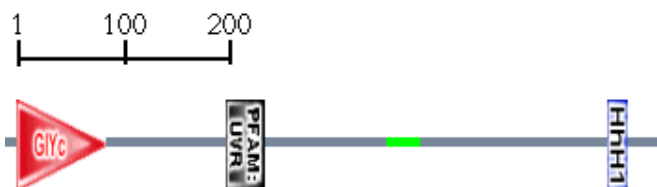

**Protein** Q8XBL5

**Description** DNA LIGASE.

**Species** Escherichia coli o157:h7

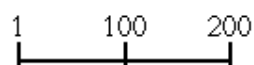

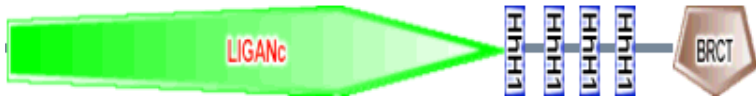

**Protein Q9HZ87**

**Description HYPOTHETICAL PROTEIN PA3140.**

**Species Pseudomonas aeruginosa**

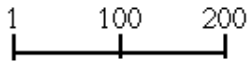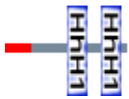

**Protein Q9GRA1**

**Description DMC1 HOMOLOGUE CNDMC1 (FRAGMENT).**

**Species Hydra oligactis**

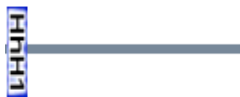

**Protein Q98AC3**

**Description TRANSPOSASE.**

**Species Rhizobium loti**

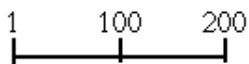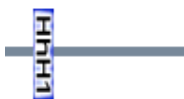

**Protein RPOA\_SPIMX**

**Description DNA-directed RNA polymerase alpha chain (EC 2.7.7.6) (Transcriptase alpha chain) (RNA**

polymerase alpha subunit).

**Species** Spirogyra maxima

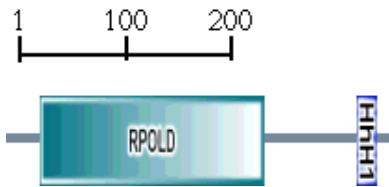

**Protein** AAL91594

**Description** DNA POLYMERASE BETA.

**Species** Homo sapiens

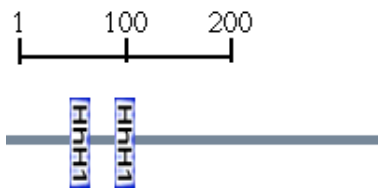

**Protein** Q8Y8F9

**Description** HYPOTHETICAL PROTEIN LMO0945.

**Species** Listeria monocytogenes

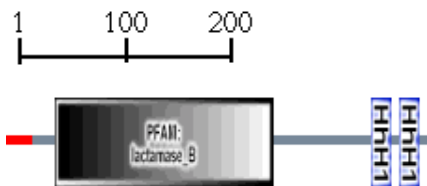

**Protein** Q99LC7

**Description** SIMILAR TO KINESIN-LIKE 4.

**Species** Mus musculus

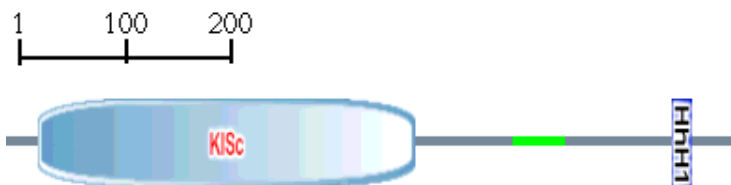



**Protein P72464**  
**Description ORF1.**  
**Species Streptomyces lividans**

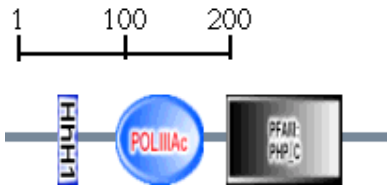

**Protein Q96K64**  
**Description CDNA FLJ14480 FIS, CLONE MAMMA1002215.**  
**Species Homo sapiens**

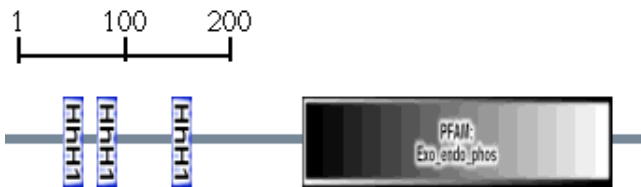

**Protein Q974S1**  
**Description PUTATIVE HELICASE.**  
**Species Sulfolobus tokodaii**

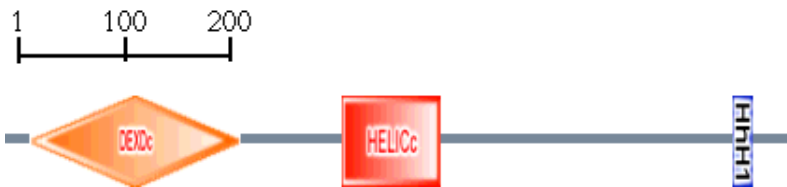

**Protein Q9HMU5**  
**Description EXCISION NUCLEASE CHAIN C.**  
**Species Halobacterium**

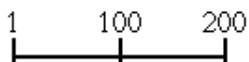

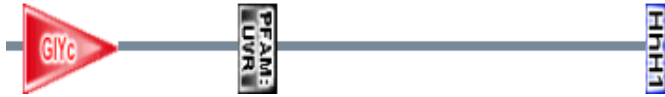

**Protein** Q8XE54

**Description** ORF, HYPOTHETICAL PROTEIN.

**Species** Escherichia coli o157:h7

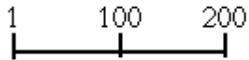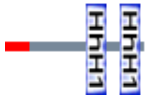

**Protein** Q96NY9

**Description** MUS81 ENDONUCLEASE.

**Species** Homo sapiens

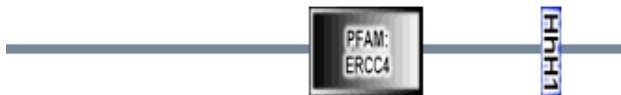

**Protein** AAM34796

**Description** EXCISION REPAIR CROSS-COMPLEMENTING RODENT REPAIR DEFICIENCY, COMPLEMENTATION GROUP 1 (INCLUDES OVERLAPPING ANTISENSE SEQUENCE).

**Species** Homo sapiens

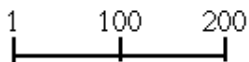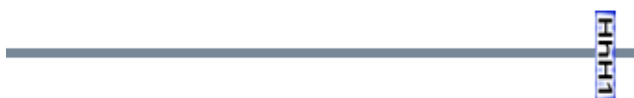

**Protein** AAL98145  
**Description** HYPOTHETICAL 14.3 KDA PROTEIN.  
**Species** Streptococcus pyogenes mgas8232

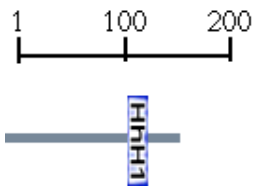

**Protein** O27790  
**Description** DNA MISMATCH RECOGNITION PROTEIN MUTS.  
**Species** Methanobacterium thermoautotrophicum

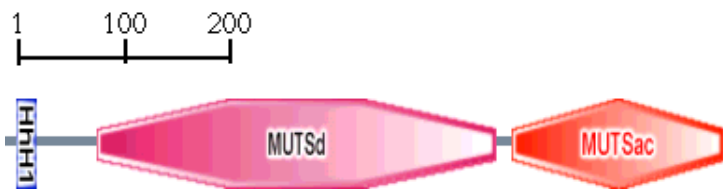

**Protein** AAL92998  
**Description** DNA REPAIR PROTEIN RHP51.  
**Species** Dictyostelium discoideum

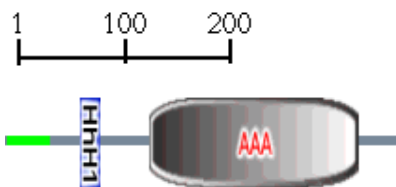

**Protein** AAM05700  
**Description** PREDICTED PROTEIN.  
**Species** Methanosarcina acetivorans str

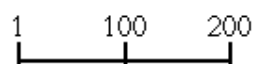

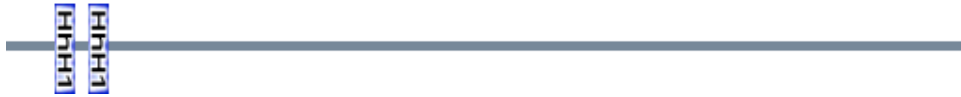

**Protein** RADA\_METMP

**Description** DNA repair and recombination protein radA.

**Species** Methanococcus maripaludis

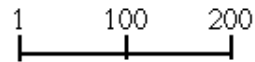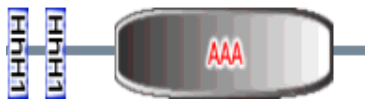

**Protein** AAK99292

**Description** HYPOTHETICAL PROTEIN.

**Species** Streptococcus pneumoniae r6

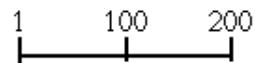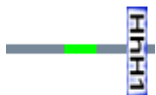

**Protein** AAM04167

**Description** DNA-DIRECTED DNA POLYMERASE, FAMILY X.

**Species** Methanosarcina acetivorans str

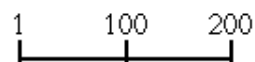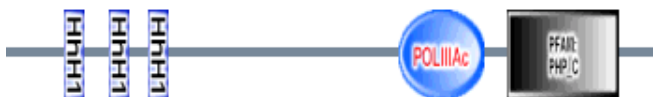

**Protein** Q9I869

**Description** KINESIN (CHROMOKINESIN XKID).

**Species** *Xenopus laevis*

1 100 200

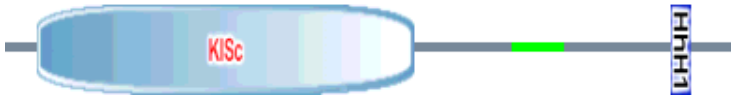

**Protein** AAM06907

**Description** DNA REPAIR PROTEIN.

**Species** *Methanosarcina acetivorans* str

1 100 200

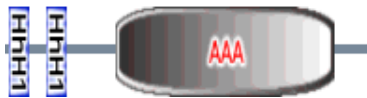

**Protein** Q94K65

**Description** HYPOTHETICAL 17.6 KDA PROTEIN.

**Species** *Arabidopsis thaliana*

1 100 200

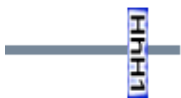

**Protein** Q8XIE6

**Description** EXODEOXYRIBONUCLEASE V ALPHA SUBUNIT.

**Species** *Clostridium perfringens*

1 100 200

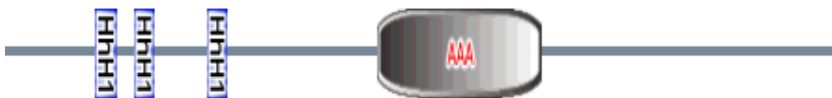

**Protein**      **AAH27384**

**Description** **RAD51 HOMOLOG (S. CEREVISIAE).**

**Species**      **Mus musculus**

1      100      200

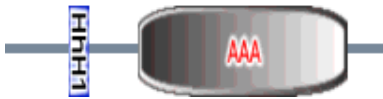

**Protein**      **Q97EC6**

**Description** **PREDICTED NUCLEIC-ACID-BINDING  
PROTEIN PROTEIN, CONTAINING HHH  
DOMAIN, YACK B.SUBTILIS ORTHOLOG.**

**Species**      **Clostridium acetobutylicum**

1      100      200

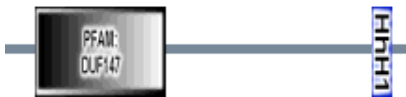

**Protein**      **AAM23354**

**Description** **RECOMBINATIONAL DNA REPAIR PROTEIN.**

**Species**      **Thermoanaerobacter tengcongensis**

1      100      200

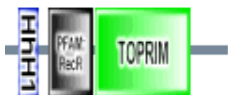

**Protein**      **Q9FF89**

**Description** **GENOMIC DNA, CHROMOSOME 5, P1  
CLONE:MRO11.**

**Species**      **Arabidopsis thaliana**

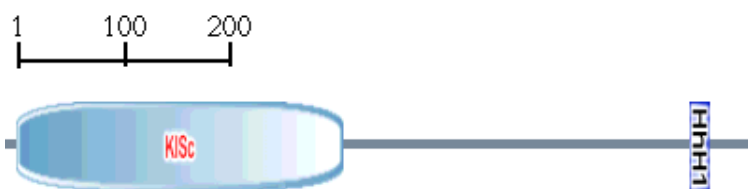

**Protein** AAM02891

**Description** ERCC4-LIKE HELICASE-NUCLELEASE.

**Species** Methanopyrus kandleri av19

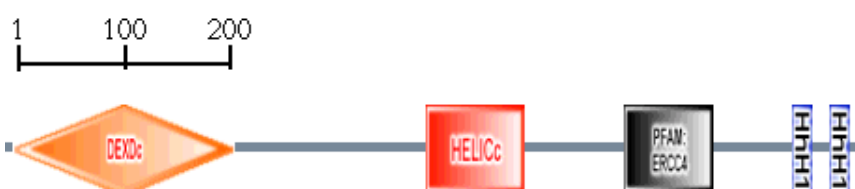

**Protein** HELS\_METTH

**Description** Putative ski2-type helicase (EC 3.6.1.-).

**Species** Methanobacterium thermoautotrophicum

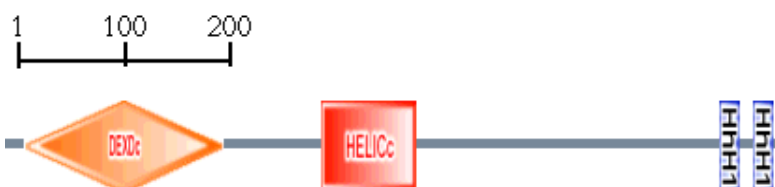

**Protein** AAL82139

**Description** ATP-DEPENDENT RNA HELICASE, PUTATIVE.

**Species** Pyrococcus furiosus dsm 3638

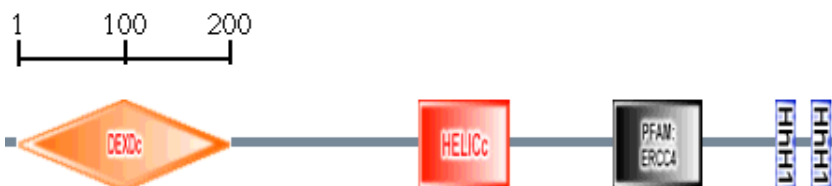

**Protein** O30253

**Description** DNA REPAIR PROTEIN, PUTATIVE.

**Species** Archaeoglobus fulgidus

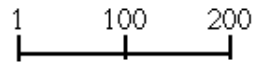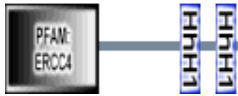

**Protein** Q9HSD6

**Description** VNG0284C.

**Species** Halobacterium

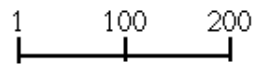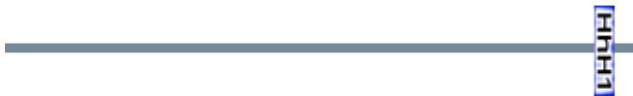

**Protein** Q9WY43

**Description** CONSERVED HYPOTHETICAL PROTEIN.

**Species** Thermotoga maritima

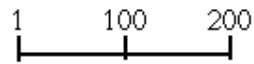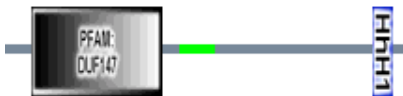

**Protein** AAK84937

**Description** SD02282P.

**Species** Drosophila melanogaster

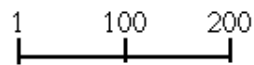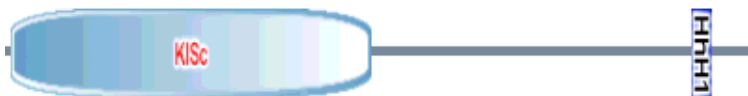



**Protein** AAL98006

**Description** PUTATIVE COMPETENCE PROTEIN.

**Species** *Streptococcus pyogenes* mgas8232

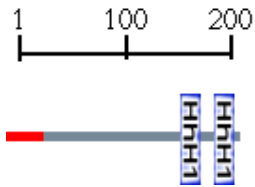

**Protein** O85197

**Description** COMPETENCE PROTEIN.

**Species** *Streptococcus pneumoniae*

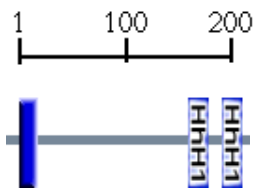

**Protein** AAM31083

**Description** ATP-DEPENDENT RNA HELICASE, EIF-4A FAMILY.

**Species** *Methanosarcina mazei* goe1

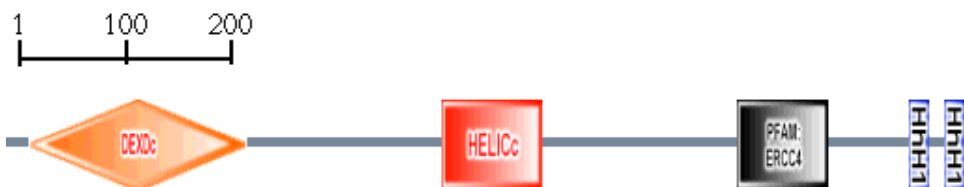

**Protein** AAM24182

**Description** DNA UPTAKE PROTEIN AND RELATED DNA-BINDING PROTEINS.

**Species** *Thermoanaerobacter tengcongensis*

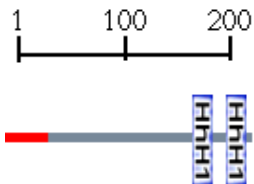

**Protein** Q9HMW5  
**Description** ATP-DEPENDENT RNA HELICASE HOMOLOG  
 EIF-4A.  
**Species** Halobacterium

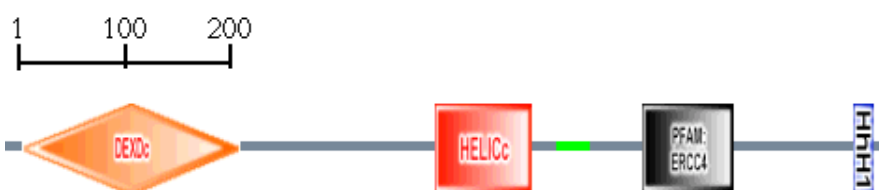

**Protein** RECR\_BACSU  
**Description** Recombination protein recR.  
**Species** Bacillus subtilis

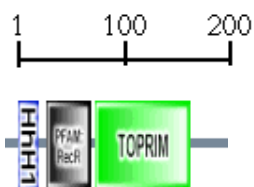

**Protein** Q9BTN8  
**Description** UNKNOWN (PROTEIN FOR MGC:1149).  
**Species** Homo sapiens

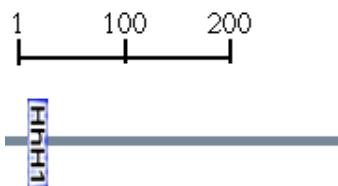

**Protein** Q8X233

**Description** **HOMOLOGUE OF THE BACTERIAL RECA AND YEAST RAD51/DMC1.**

**Species** **Aeropyrum pernix**

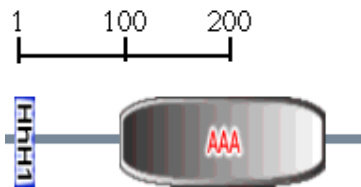

**Protein** **NOD\_DROME**

**Description** **KINESIN-LIKE PROTEIN NOD.**

**Species** **Drosophila melanogaster**

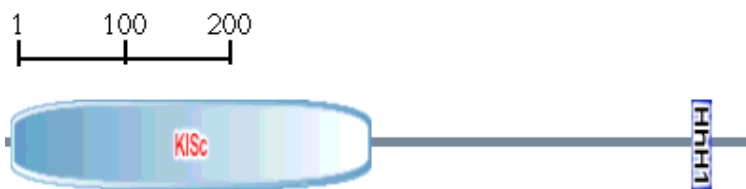

Supplement: pnas_202127199_12.pdf [file pnas_202127199_12.pdf]
