# Supplementary material
Source: PubMed Central journal article supplement (PMC129704)
Supplement: pnas_202127199_11.pdf [file pnas_202127199_11.pdf]

**Table 1. Inhibition of DNA polymerases, DNA polymerase fragments, and DNA polymerase chimeras by salts.**

| Protein          | NaCl  |       |      |                | KCl   |       |          |                | KGlu   |       |       |                  |          |       |
|------------------|-------|-------|------|----------------|-------|-------|----------|----------------|--------|-------|-------|------------------|----------|-------|
|                  | $K_i$ | $\pm$ | S.E. | $\alpha$       | $\pm$ | S.E.  | $\alpha$ | $\pm$          | S.E.   | $K_i$ | $\pm$ | S.E.             | $\alpha$ | $\pm$ |
|                  | mM    |       |      |                | mM    |       |          |                | mM     |       |       |                  |          |       |
| TopoTaq          | 241.3 | $\pm$ | 14   | $7.04 \pm 1.4$ | 291.1 | $\pm$ | 10       | $6.45 \pm 0.6$ | 1403.0 | $\pm$ | 20    | $6.03 \pm 0.4$   |          |       |
| TaqTopoC1        | 228.4 | $\pm$ | 6    | $4.27 \pm 0.2$ | 231.2 | $\pm$ | 12       | $5.02 \pm 0.6$ | 1730.0 | $\pm$ | 125   | $2.45 \pm 0.6$   |          |       |
| TaqTopoC2        | 238.4 | $\pm$ | 3    | $6.77 \pm 0.2$ | 251.0 | $\pm$ | 6        | $8.97 \pm 0.6$ | 1164.5 | $\pm$ | 42    | $4.34 \pm 0.5$   |          |       |
| TaqTopoC3        | 69.0  | $\pm$ | 14   | $1.86 \pm 0.2$ | 187.7 | $\pm$ | 2        | $3.87 \pm 0.1$ | 295.8  | $\pm$ | 92    | $1.21 \pm 0.2$   |          |       |
| Taq polymerase   | 138.7 | $\pm$ | 6    | $3.24 \pm 0.5$ | 161.0 | $\pm$ | 6        | $3.50 \pm 0.2$ | 610.1  | $\pm$ | 51    | $4.45 \pm 0.3$   |          |       |
| Stoffel Fragment | 38.6  | $\pm$ | 3    | $3.45 \pm 0.2$ | 45.8  | $\pm$ | 4        | $2.92 \pm 0.1$ | 59.6   | $\pm$ | 38    | $1.47 \pm 0.4$   |          |       |
| KlenTaq          | 40.0  | $\pm$ | 5    | $1.83 \pm 0.1$ | 32.7  | $\pm$ | 7        | $1.49 \pm 0.2$ | 71.0   | $\pm$ | 24    | $0.89 \pm 0.1$   |          |       |
| Pfu polymerase   | 51.5  | $\pm$ | 1    | $2.39 \pm 0.1$ | 42.6  | $\pm$ | 1        | $3.65 \pm 0.1$ | 42.8*  | $\pm$ | 6     | $3.24^* \pm 0.2$ |          |       |
| PfuC2            | 159.6 | $\pm$ | 33   | $3.62 \pm 0.8$ | 176.8 | $\pm$ | 3        | $4.68 \pm 0.1$ | 424.8* | $\pm$ | 9     | $5.76^* \pm 0.2$ |          |       |

To take into account the activation of *Pfu* polymerase and the PfuC2 hybrid by KGlu, the experimental values of initial polymerization rates were analyzed by nonlinear regression using the following function:

$$v = \frac{v_0 \cdot (1 + b \cdot [Salt]^\beta)}{1 + \left( \frac{[Salt]}{K_i} \right)^\alpha}$$

where  $v$  and  $v_0$  are initial primer extension rates with and without salt, respectively;  $K_i$  is an apparent inhibition constant,  $\alpha$  is a parameter of cooperativity,  $\beta$  and  $\gamma$  are parameters of activation. Because  $\gamma \cong 2$ , it is likely that two ions of  $\text{Glu}^-$  bind to the *Pfu* polymerase catalytic domain without inhibiting the polymerase activity.
