# Supplementary material
Source: PubMed Central journal article supplement (PMC129704)

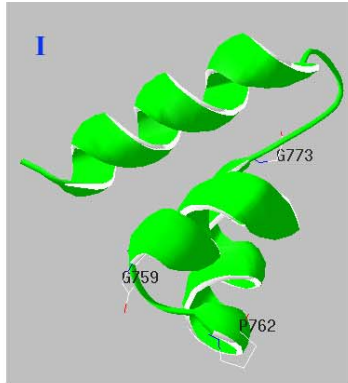

TopoV 752 YKTLRDAGLTPAAEERVLKRYGVSVKVQEGATPDELRELG  
 1c7y 164 VAALVALGYKQGEASRMVSKIARPDASSETLIRRALRAAL-

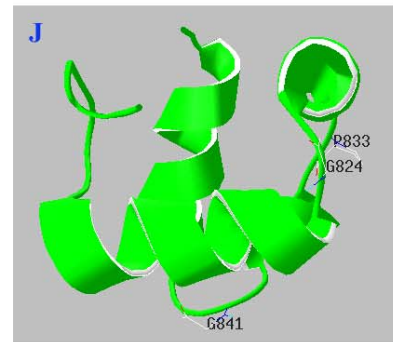

TopoV 803 LRSLVNRKRLDVTAYELKRRYGSVSAVRKAPVKEIRELGLSDRKIARIKGI P  
 1dgs 507 LYALGLPGVGEVLARNLARREFGTMDRLEASLEELIEVEEVGELTARALLET

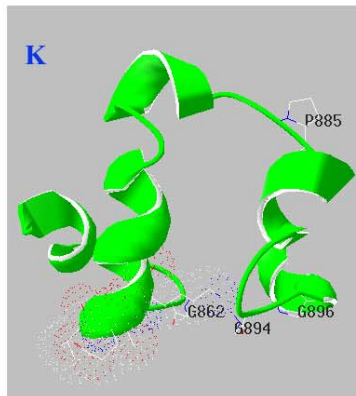

TopoV 853 IPETMLQVRGMSVEKAERLLEREDTWTVKKEAPVSELVVRVGVGLSLVK  
 1dgs 505 RLLYALGLPGVGEVLARNLARREFGTMDRLEASLEELIEVEEVGELTAR

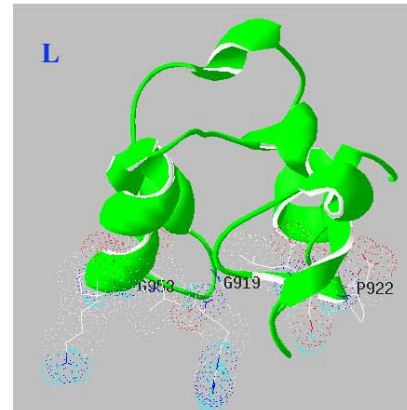

TopoV 910 AWKALLDVKGVSPELADRLVEELGS PYRVLT  
 1dgs 505 RLLYALGLPGVGEVLARNLARREFGTMDRLE  
 TopoV 941 AKKSDLMRVERVGPKLAERIRAAGKRYVEERRRRERIRKLR-G  
 1bpy 95 SSINFLTRVSGICPSAARKFVDEGIKTLLEDLRKNEKLNHHQRIG

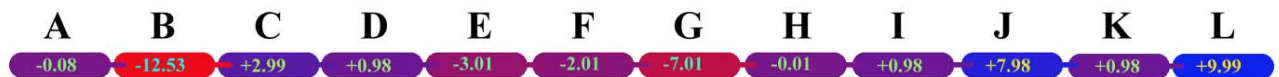

Supplement: pnas_202127199_19.pdf [file pnas_202127199_19.pdf]
