# Supplementary material
Source: PubMed Central journal article supplement (PMC129704)

**A**

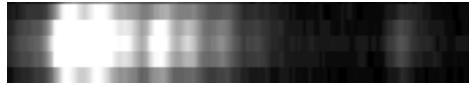

**B**

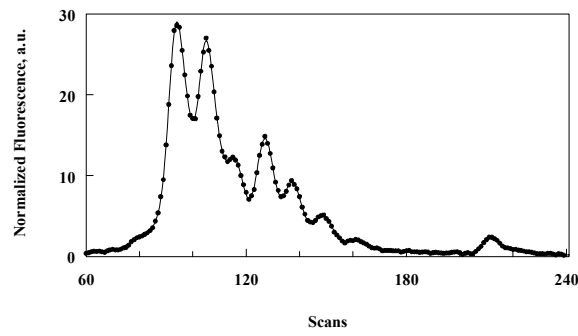

**C**

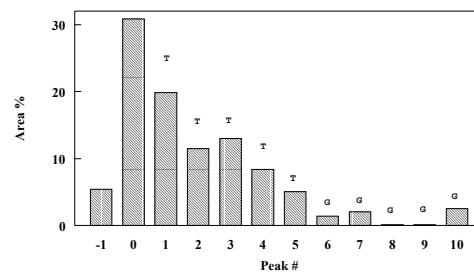

Supplement: pnas_202127199_14.pdf [file pnas_202127199_14.pdf]

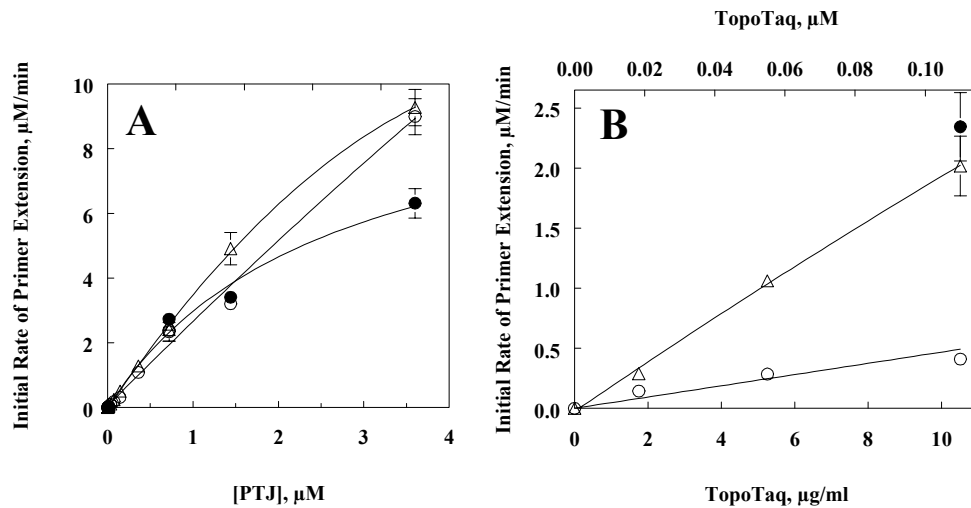

Supplement: pnas_202127199_15.pdf [file pnas_202127199_15.pdf]

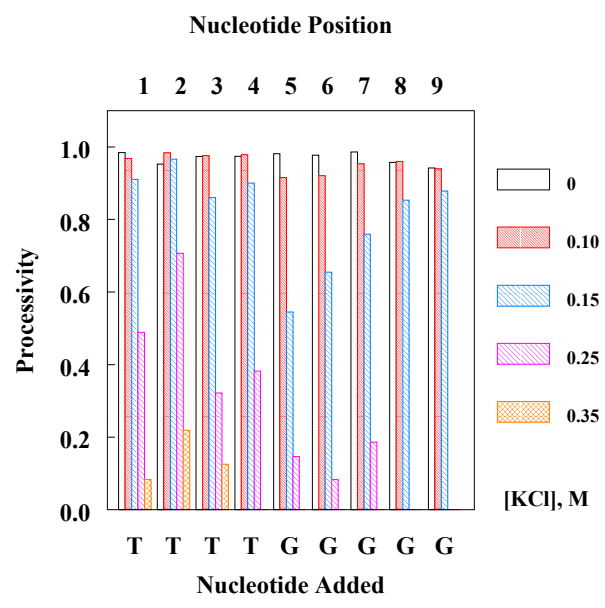

Supplement: pnas_202127199_16.pdf [file pnas_202127199_16.pdf]

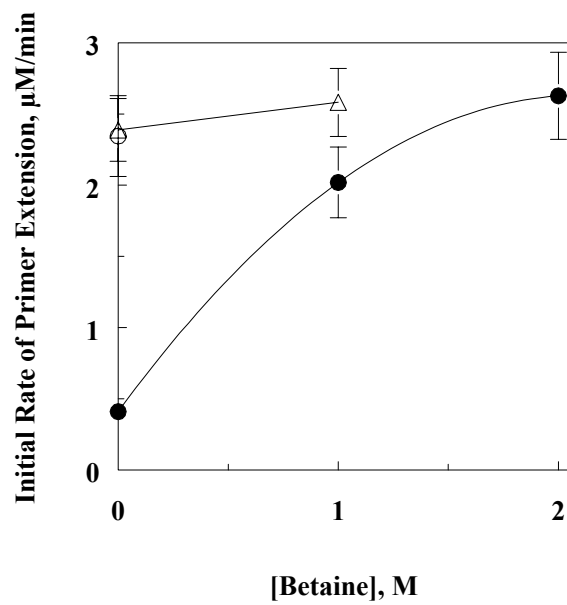

Supplement: pnas_202127199_17.pdf [file pnas_202127199_17.pdf]

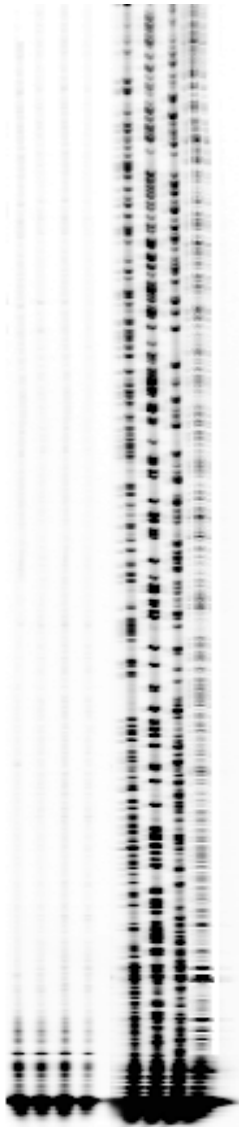

*Taq* | TopoTaq  
polymerase

Supplement: pnas_202127199_18.pdf [file pnas_202127199_18.pdf]

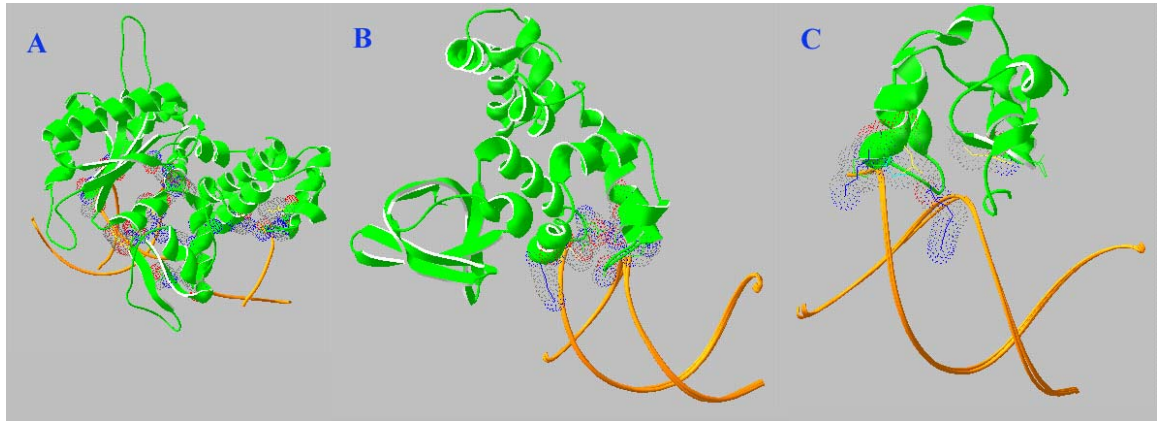

Supplement: pnas_202127199_21.pdf [file pnas_202127199_21.pdf]

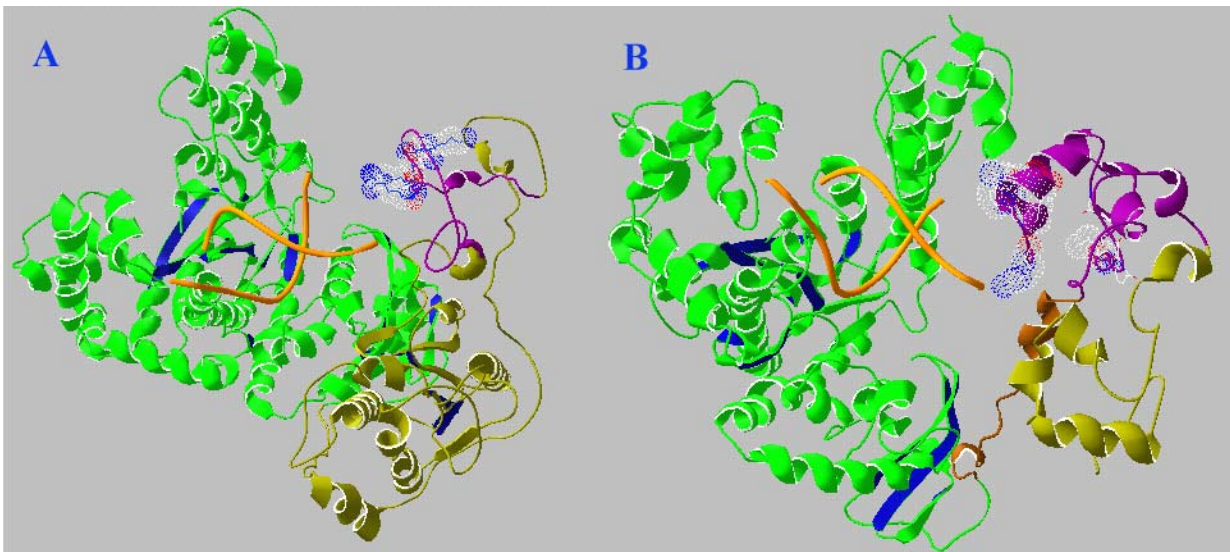

Supplement: pnas_202127199_22.pdf [file pnas_202127199_22.pdf]
